# Supplementary material for: The role of rye bran and antibiotics on the digestion, fermentation process and short-chain fatty acid production and absorption in an intact pig model
Source: Royal Society of Chemistry journal article supplement (doi:10.1039/d1fo00213a), 2021-01-01
Supplement: d1fo00213a1.pdf [file d1fo00213a1.pdf]

**Table S1.** Chemical composition of fiber sources in the diets.

| Chemical composition (g/kg DM) | Wheat flour | Rye bran    | Vitacel WF 600 |
|--------------------------------|-------------|-------------|----------------|
| DM (g/kg as-fed basis)         | 864         | 906         | 938            |
| Ash                            | 2           | 53          | n.m.           |
| Protein (N × 6.25)             | 139         | 213         | n.m.           |
| HCL fat                        |             | 34          | n.m.           |
| Available carbohydrates        | 788         | 187         | n.m.           |
| Sugars                         | 20          | 67          | n.m.           |
| Starch                         | 768         | 120         | n.m.           |
| Dietary fiber <sup>9</sup>     | 39          | 537         | 1000           |
| Total NSP (soluble NSP)        | 30 (14)     | 433 (57)    | 1000           |
| NCP glucose                    | 3           | 76          | 71             |
| Cellulose                      | 2           | 45          | 717            |
| AX (soluble AX)                | 18 (9)      | 283 (42)    | 168 (n.m.)     |
| A:X (soluble A:X)              | 0.80 (0.80) | 0.52 (0.56) | 0.09 (n.m.)    |
| Fructans                       | 0           | 32          | n.m.           |
| Klason lignin                  | 9           | 72          | n.m.           |

Abbreviations: DM, dry matter; NSP, non-starch polysaccharides; NCP, non-cellulosic polysaccharides; AX, arabinoxylan; A:X, arabinose:xylose ratio; n.m., not measured.

**Table S2.** Pool size of total, individual short chain fatty acids (SCFA) and total branched chain fatty acids (BCFA) in different intestinal segments and large intestine of pigs fed with refined wheat fiber diet (Control), rye bran diet with (RB+) and without antibiotic treatment (RB-).

| Pool size, mmol | Segment | Diet <sup>1</sup>  |                     |                     | SEM  | P-value <sup>2</sup> |         |                |
|-----------------|---------|--------------------|---------------------|---------------------|------|----------------------|---------|----------------|
|                 |         | Control            | RB-                 | RB+                 |      | Diet                 | Segment | Diet × Segment |
| SCFA            | SI3     | 13 <sup>g</sup>    | 19 <sup>fg</sup>    | 15 <sup>fg</sup>    | 7.8  | <0.001               | <0.001  | <0.001         |
|                 | Caecum  | 45 <sup>cdef</sup> | 54 <sup>cde</sup>   | 38 <sup>cdefg</sup> |      |                      |         |                |
|                 | Co1     | 145 <sup>a</sup>   | 75 <sup>bc</sup>    | 70 <sup>bcd</sup>   |      |                      |         |                |
|                 | Co2     | 84 <sup>b</sup>    | 51 <sup>cdef</sup>  | 44 <sup>cdefg</sup> |      |                      |         |                |
|                 | Co3     | 69 <sup>bcd</sup>  | 33 <sup>defg</sup>  | 29 <sup>efg</sup>   |      |                      |         |                |
| Acetate         | SI3     | 7.3 <sup>f</sup>   | 12 <sup>ef</sup>    | 9.5 <sup>ef</sup>   | 4.9  | <0.001               | <0.001  | <0.001         |
|                 | Caecum  | 31 <sup>cde</sup>  | 31 <sup>cdef</sup>  | 21 <sup>cdef</sup>  |      |                      |         |                |
|                 | Co1     | 98 <sup>a</sup>    | 43 <sup>bc</sup>    | 41 <sup>bcd</sup>   |      |                      |         |                |
|                 | Co2     | 55 <sup>b</sup>    | 30 <sup>cdef</sup>  | 25 <sup>cdef</sup>  |      |                      |         |                |
|                 | Co3     | 40 <sup>bcd</sup>  | 19 <sup>def</sup>   | 16 <sup>ef</sup>    |      |                      |         |                |
| Propionate      | SI3     | 0.40 <sup>f</sup>  | 0.31 <sup>f</sup>   | 0.20 <sup>f</sup>   | 1.7  | <0.001               | <0.001  | <0.001         |
|                 | Caecum  | 9.8 <sup>cde</sup> | 11 <sup>bcde</sup>  | 8.5 <sup>cde</sup>  |      |                      |         |                |
|                 | Co1     | 30 <sup>a</sup>    | 15 <sup>bc</sup>    | 14 <sup>bcd</sup>   |      |                      |         |                |
|                 | Co2     | 18 <sup>b</sup>    | 11 <sup>bcde</sup>  | 9.0 <sup>cde</sup>  |      |                      |         |                |
|                 | Co3     | 14 <sup>bcde</sup> | 7.0 <sup>edf</sup>  | 6.2 <sup>ef</sup>   |      |                      |         |                |
| Butyrate        | SI3     | 0.47 <sup>e</sup>  | 1.14 <sup>e</sup>   | 0.43 <sup>e</sup>   | 1.2  | 0.169                | <0.001  | <0.001         |
|                 | Caecum  | 2.3 <sup>de</sup>  | 9.4 <sup>a</sup>    | 4.3 <sup>bcde</sup> |      |                      |         |                |
|                 | Co1     | 12 <sup>a</sup>    | 11 <sup>a</sup>     | 11 <sup>a</sup>     |      |                      |         |                |
|                 | Co2     | 9.0 <sup>ab</sup>  | 7.7 <sup>abc</sup>  | 6.4 <sup>abcd</sup> |      |                      |         |                |
|                 | Co3     | 8.2 <sup>abc</sup> | 4.2 <sup>bcde</sup> | 3.4 <sup>cde</sup>  |      |                      |         |                |
| BCFA            | SI3     | 0.0                | 0.0                 | 0.0                 | 0.23 | 0.004                | <0.001  | 0.265          |
|                 | Caecum  | 0.36               | 0.62                | 0.42                |      |                      |         |                |
|                 | Co1     | 1.3                | 2.1                 | 1.6                 |      |                      |         |                |
|                 | Co2     | 0.91               | 2.0                 | 1.5                 |      |                      |         |                |
|                 | Co3     | 0.86               | 1.9                 | 1.0                 |      |                      |         |                |
| SCFA            | LI      | 364 <sup>a</sup>   | 203 <sup>b</sup>    | 180 <sup>b</sup>    | 18   | <0.001               | -       | -              |
| Acetate         | LI      | 225 <sup>a</sup>   | 117 <sup>b</sup>    | 104 <sup>b</sup>    | 15   | <0.001               | -       | -              |
| Propionate      | LI      | 74 <sup>a</sup>    | 42 <sup>b</sup>     | 41 <sup>b</sup>     | 6.3  | <0.001               | -       | -              |
| Butyrate        | LI      | 33                 | 32                  | 25                  | 4.9  | 0.217                | -       | -              |
| BCFA            | LI      | 3.8 <sup>b</sup>   | 7.1 <sup>a</sup>    | 5.2 <sup>ab</sup>   | 0.8  | 0.021                | -       | -              |

Abbreviations: SI3, distal one-third of the small intestine; Co1, proximal one-third of the colon; Co2, mid one-third of the colon; Co3, distal one-third of the colon; LI, large intestine (caecum + colon).

<sup>1</sup>Data were expressed as means with standard error of means (SEM) and  $n = 10$  per group.

<sup>2</sup>Mean values with unlike superscript letters were significantly different ( $P < 0.05$ ).
